# Supplementary material for: Pseurotin A Validation as a Metastatic Castration-Resistant Prostate Cancer Recurrence-Suppressing Lead via PCSK9-LDLR Axis Modulation
Source: MDPI journal article supplement (doi:10.3390/md21040215), 2023-03-28
Supplement: s1 [file s1]

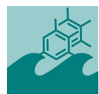

**Supplementary Table S1:** Clinical characteristics of prostate cancer tissue cores.

| Variable                   | Normal         | PC             |
|----------------------------|----------------|----------------|
| Total number               | 18             | 174            |
| Age (Mean $\pm$ SD)        | 35.3 $\pm$ 5.7 | 68.7 $\pm$ 9.1 |
| Gleason score (n)          |                |                |
| GS <7                      |                | 55             |
| GS=7                       |                | 47             |
| GS>7                       |                | 52             |
| Not reported               |                | 20             |
| T-stage (n)                |                |                |
| I                          |                | 0              |
| II                         |                | 132            |
| III                        |                | 39             |
| IV                         |                | 3              |
| Lymph node involvement (n) |                |                |
| Yes                        |                | 3              |
| No                         |                | 171            |
